# Supplementary material for: The layer boundary effect on multi-layer mesoporous TiO2 film based dye sensitized solar cells
Source: Royal Society of Chemistry journal article supplement (doi:10.1039/c6ra18830c), 2016-01-01
Supplement: c6ra18830c1.pdf [file c6ra18830c1.pdf]

## The Layer Boundary Effect on Multi-Layer Mesoporous TiO<sub>2</sub> Film based Dye Sensitized Solar Cells

Feng Xu,<sup>a</sup> Kai Zhu<sup>b\*</sup> and Yixin Zhao<sup>a\*</sup>

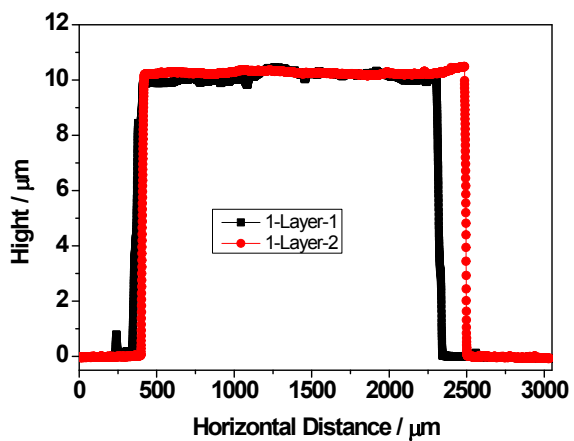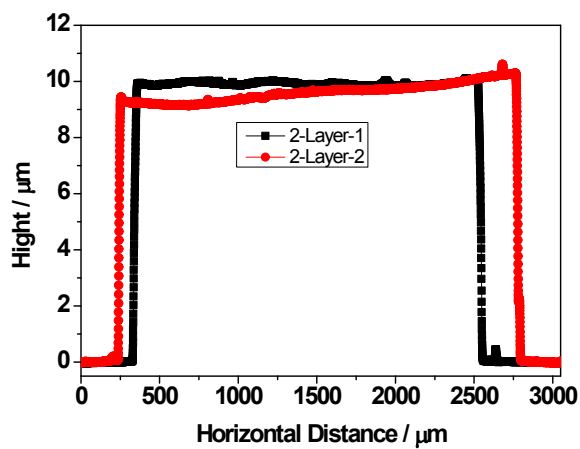

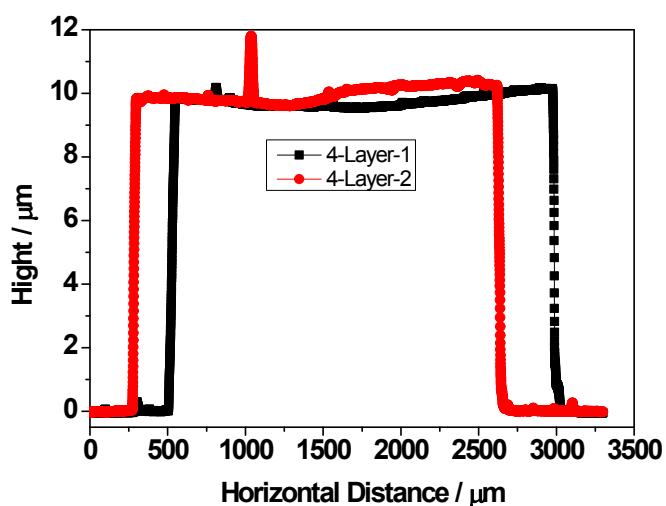

Figure S1. The typical profiler scan curves of the 1-, 2- and 4-layer TiO<sub>2</sub> films. Two samples from each type of TiO<sub>2</sub> films were examined.

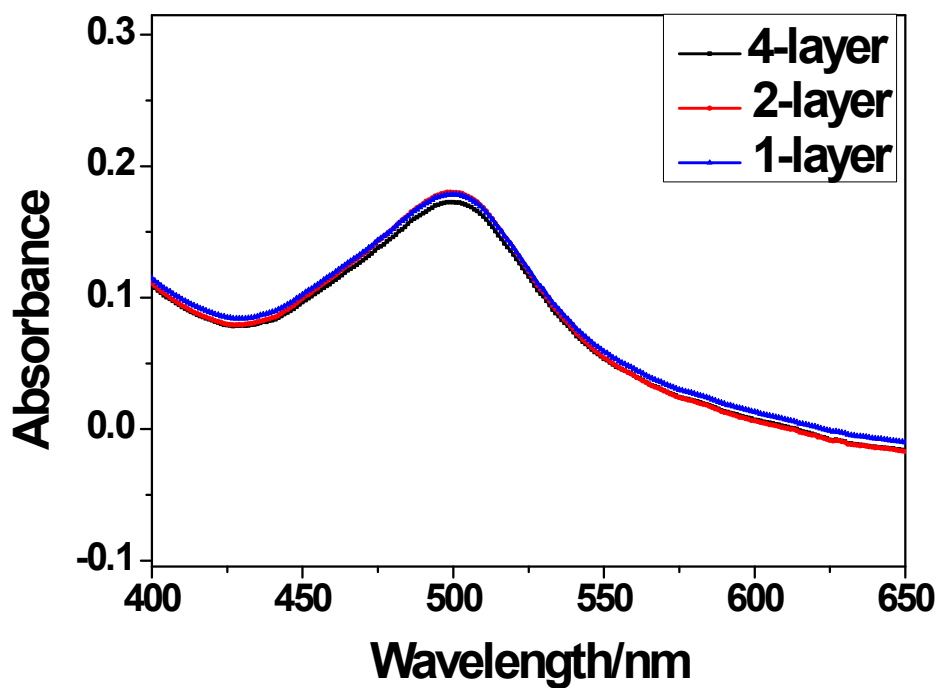

Figure S2. The absorbance of 4mL 0.1 M NaOH dye solution de-absorbed from these 3 different 5.5mm\*5.5mm sized TiO<sub>2</sub> films
